# Supplementary material for: Continuous detection of trace level concentration of oil droplets in water using microfluidic AC electroosmosis (ACEO)
Source: Royal Society of Chemistry journal article supplement (doi:10.1039/c5ra15624f), 2015-01-01
Supplement: c5ra15624f2.pdf [file c5ra15624f2.pdf]

## Electronic Supplementary Information for

### Continuous detection of trace level concentration of oil droplets in water using microfluidic AC electroosmosis (ACEO)

Dhiman Das,<sup>\*ab</sup> Yan Zhibin,<sup>c</sup> Nishanth V. Menon,<sup>a</sup> Kang Yuejun,<sup>a</sup> Vincent Chan,<sup>a</sup> and Chun Yang,<sup>c</sup>

<sup>a</sup>School of Chemical and Biomedical Engineering, Nanyang Technological University, 62 Nanyang Avenue, Singapore-637459.

<sup>b</sup>Nanyang Environment and Water Research Institute, Nanyang Technological University, 1 Cleantech Loop, Singapore-637141.

<sup>c</sup>School of Mechanical and Aerospace Engineering, Nanyang Technological University, 50 Nanyang Avenue, Singapore-639798.

\*Email: [dhiman001@e.ntu.edu.sg](mailto:dhiman001@e.ntu.edu.sg)

#### S1. Image Processing for the calculation of the enrichment efficiency

ImageJ (National Institutes of Health, USA), an open-source image processing software was used for estimating the enrichment efficiency. A similar image processing scheme was used by Conn, Ma, Hirasaki and Biswal, 2014<sup>1</sup> for quantifying oil displacement mechanism in microfluidic device. First, 8-bit images of the circular entrapment were taken using the high-speed camera when the electric field is off and after the electric field is turned on. This is shown in Fig. (a) and (b). The above images (a) and (b) were obtained when the applied AC signal is 200 V and 100 Hz.

After obtaining the raw images, thresholding (c) of the images was determined in ImageJ for increasing the contrast and for accentuating the finer details in the image. This was followed by selection (d) of the oil droplets and counting the pixels within the selected oil droplets. Finally, the enrichment efficiency was determined by

$$\frac{[P(t) - P_o]}{P_o} * 100$$

where P(t) is the pixel count at time, t seconds and P<sub>o</sub> is the pixel count before the electric field is applied and the pixel counting is done within the oil phase only. In the images shown in Fig. 8, P<sub>o</sub> = 9438 and P(t=6s)=13931, so the enrichment efficiency obtained using the above equation is 47.6%.

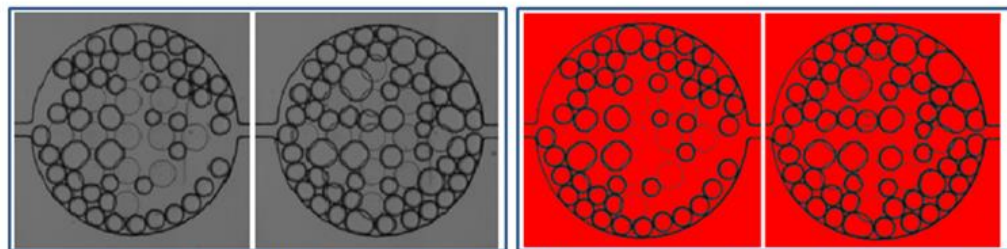

(a) Electric Field OFF,  $t=0$  s (b) Electric Field ON, (c) Thresholding of the previous two images after  $t=6$  s at  $t=0$  s and  $t=6$  s.

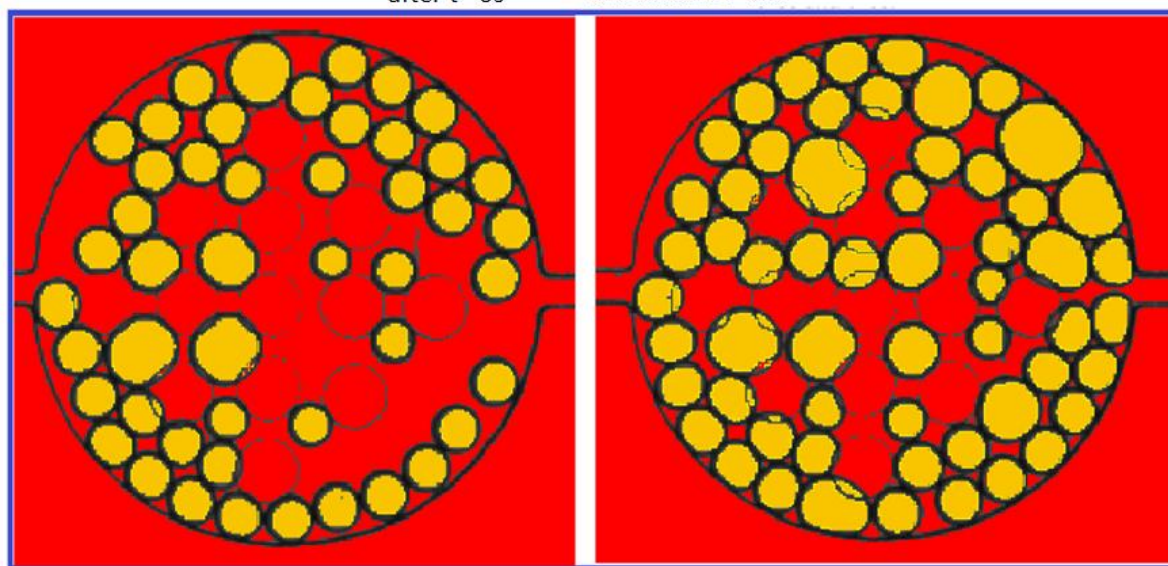

(c) Selection of the pixels within the oil phase of the previous two images at  $t=0$  s and  $t=6$  s.

**Fig. S1** shows the protocol for obtaining the entrapment efficiency via image processing.

#### Reference

1. C. A. Conn, K. Ma, G. J. Hirasaki and S. L. Biswal, *Lab Chip*, 2014, 14, 3968-3977.
